# Supplementary material for: Convergence of two global regulators to coordinate expression of essential virulence determinants of Mycobacterium tuberculosis
Source: eLife journal article supplement (doi:10.7554/elife.80965), 2022-10-24
Supplement: data1 [file Figure 1-figure supplement 1(A-B).xlsx]

## Sheet: Sheet1
					Avg
			A		Rv pH 7					Normal
					Cт Mean	dct				Rv pH 7
				PhoP	23.3796	18.6222				PhoP	rpoB
				rpoB	16.6413	11.8839			dct	18.6222	11.8839
					phoP compl. pH 7					phoP compl.pH 7
					Cт Mean	dct				PhoP	rpoB
				PhoP	20.928	16.0233			dct	16.0233	11.459
				rpoB	16.3637	11.459
									ddct	-2.59888	-0.424903
										PhoP	rpoB
									H37Rv	1	1
									phoP compl.	6.05817	1.34248
										PhoP	rpoB
									H37Rv	1	1
									phoP compl.	6.05817	1.34248
			B		Rv pH 4.5					pH 4.5
					Cт Mean	dct				PhoP	rpoB
				PhoP	22.8351	17.6269			dct	17.6269	11.4308
				rpoB	16.639	11.4308
										phoP compl. 4.5
					phoP compl. pH 4.5					PhoP	rpoB
					Cт Mean	dct			dct	15.3966	12.2564
				PhoP	21.1261	15.3966
				rpoB	17.9859	12.2564			ddct	-2.23034	0.825573
										PhoP	rpoB
									H37Rv	1	1
									phoP compl. Normal	4.69244	0.564258
									Rv N	Sterror
									PhoP	0.341948
									rpoB	0.230761
									phoP compl. N	Sterror
									PhoP	0.338306
									rpoB	0.767741
									Rv A	Sterror
									PhoP	0.268795
									rpoB	0.545648
									phoP compl. A	Sterror
									PhoP	0.311785
									rpoB	0.637736
