# Supplementary material for: Convergence of two global regulators to coordinate expression of essential virulence determinants of Mycobacterium tuberculosis
Source: eLife journal article supplement (doi:10.7554/elife.80965), 2022-10-24
Supplement: data1 [file Figure 1A-source data.xlsx]

## Sheet: Sheet4
		1A
		Normal								NO stress								Acid Stress
			icl1			umaA			whiB1		icl1		umaA		whiB1			icl1			umaA			whiB1
			set1	set2	set3	set 1	set 2	set3	set1	set2	SET1	set2	SET1	set2	set1	set2	set3	set1	set2	set3	set1	set2	set3	set1	set2	set3
		Rv	1	1	1	1	1	1	1	1	1	1	1	1	1	1	1	1	1	1	1	1	1	1	1	1
		phoP mut	0.00320527	0.656938	0.288993	1.8501	0.495922	0.552127	0.360938	0.602904	0.0160283	0.177312	0.28681	0.552127	0.382435	0.309927	0.578344	0.00320527	0.656938	0.288993	0.552499	0.443962	0.455958	0.368019	0.418275	0.512367
		phoP compl	1.27437e-05	0.667831	0.543295	2.76375	1.1308	1.29116	0.456916	0.475949	0.135223	0.989919	0.481221	1.29116	0.716978	0.521233		1.27437e-05	0.667831	0.543295	0.626689	0.462469	0.566392	0.762631	0.459617	0.780691
		phoP D71N compl mut	0.0535085	0.300025		1.50239	1.25		0.678641	0.525861	0.450863	0.56	0.194148	0.634773	0.415413	1.0426		0.0535085	0.300025		0.212205	0.232252		0.758843	0.638752
		p value	0.023174			0.156922			0.0176964		0.00713097		0.0169642		0.0187988			0.000268526			0.000726706			0.00551881
				Normal			NO stress			Acid stress
				icl	umaA	whiB1	icl	umaA	whiB1	icl	umaA	whiB1
		Average	Rv	1	1	1	1	1	1	1	1	1
			phoP mut	0.379123	0.96605	0.481921	0.0966699	0.419469	0.423569	0.316379	0.48414	0.432887
			phoP compl	1.69207	1.72857	0.466432	0.562571	0.886192	0.619105	0.403713	0.55185	0.667646
			phoPD71N compl mut	0.161148	1.3762	0.602251	0.505431	0.414461	0.729005	0.176767	0.222229	0.698797
			p value	0.023174	0.156922	0.00247356	0.00264593	0.0169642	0.00202664	0.0145032	0.000228471	0.000320458
				icl	umaA	whiB1	icl	umaA	whiB1	icl	umaA	whiB1
		se	Rv	0	0	0	0	0	0	0	0	0
			phoP mut	0.0833083	0.128373	0.0648619	0.0403208	0.0663291	0.0566877	0.133793	0.0242924	0.0299144
			phoP compl	0.152544	0.367452	0.0419359	0.213674	0.202486	0.0489362	0.144976	0.0339132	0.0736418
			phoPD71N compl mut	0.00110746	0.0630982	0.0540159	0.135092	0.110156	0.156796	0.061629	0.0050117	0.0300228

## Sheet: Sheet1
			icl1
																							CT
				Icl1 normal
			icl1																	icl1	gapdh
		Rv	17.7554	1.66255	0	1					set1	set2	set3	avg	stdev	se			Rv NO+	19.0365	16.6527	2.38377	0	1
		phoP mut	18.7355	2.53627	0.873715	0.54574				Rv	1	1	1	1	0	0			phoP mut NO+	25.6039	17.2569	8.34701	5.96323	0.0160283
		phoP compl	17.5194	1.19061	-0.471946	1.38698				phoP mut	0.54574	0.212506	0.440248	0.399498	0.13906	0.06953			phoP compl NO+	22.7881	17.5177	5.27036	2.88658	0.135223
										phoP compl	1.38698	1.99716	0.588417	1.32418	0.576827	0.288413
			icl1							Normal										icl1	umaA	gapdh	icl1	umaA	icl1
		Rv	17.9694	0.836811	0	1					set1	set2	avg	stdev	se				Rv NO+	16.279	26.2797	17.0171	-0.738061	9.2626	0	1
		phoP mut	20.0237	3.07123	2.23442	0.212506				Rv	1	1	1	0	0				phoP mut NO+	18.8509	28.1577	17.0933	1.75758	11.0644	2.49564	0.177312
		phoP compl	17.4997	-0.161136	-0.997947	1.99716				phoP mut	0.54574	0.212506	0.379123	0.166617	0.0833083				phoP compl NO+	15.1763	26.2176	15.8998	-0.723442	10.3178	0.0146183	0.989919
										phoP compl	1.38698	1.99716	1.69207	0.305088	0.152544
										phoP compl mut	0.158933	0.163363	0.161148	0.00221492	0.00110746
			icl1							p value	0.023174
		Rv	18.0572	1.44014	0	1
		phoP mut	20.0485	2.62375	1.18361	0.440248
		phoP compl	18.7995	2.20523	0.76509	0.588417
		Acid Stress		icl1													SET2	set3	AVE	STV	SE
				set1	set2	set3	avg	std	se						Rv NO+		1	1	1
			Rv	1	1	1	1	0	0						phoP mut NO+		0.0160283	0.177312	0.0966699	0.0806416	0.0403208
			phoP mut	0.00320527	0.656938	0.288993	0.316379	0.267587	0.133793						phoP compl NO+		0.135223	0.989919	0.562571	0.427348	0.213674
			phoP compl	1.27437e-05	0.667831	0.543295	0.403713	0.289951	0.144976						phoP compl mut NO+		0.450863	0.56	0.505431	0.0545686	0.0272843
			phoP compl mut	0.0535085	0.300025		0.176767	0.123258	0.061629						pvalue		0.00264593
			pvalue	0.0145032

## Sheet: Sheet2
		set1								set2								set3
			whiB1	sigA			whiB1	sigA			whiB1	sigA			whiB1	sigA			whiB1	gapdh				whiB1	sigA
		Rv NO-	14.6597	17.1041		Rv NO+	15.603	17.1558		Rv NO-	14.65	17.1		Rv NO+	14.46	16.73		Rv NO-	15.97	16.9			Rv NO+	15.71	18.85
		phoP mut NO-	16.7539	17.7281		phoP mut NO+	16.9248	17.0909		phoP mut NO-	15.76	17.72		phoP mut NO+	16.75	17.33		phoP mut NO-	15.63	15.83			phoP mut NO+	16.54	18.89
																		phoP compl NO-	17.54	17.34			phoP compl NO+	15.84	18.5
			dt whiB1				dt whiB1				whiB1	sigA			whiB1	sigA
		Rv NO-	-2.4444			Rv NO+	-1.55277			Rv NO-	-2.45			Rv NO+	-2.27				whiB1	gapdh				whiB1
		phoP mut NO-	-0.97422			phoP mut NO+	-0.166056			phoP mut NO-	-1.96			phoP mut NO+	-0.58			Rv NO-	-0.93				Rv NO+	-3.14
																		phoP mut NO-	-0.2				phoP mut NO+	-2.35
			ddt whiB1				ddt whiB1				whiB1				whiB1			phoP compl NO-	0.2				phoP compl NO+	-2.66
		phoP mut NO-	1.47018			phoP mut NO+	1.38671			Rv NO-	0			Rv NO+	0
										phoP mut NO-	0.49			phoP mut NO+	1.69				whiB1					whiB1
			whiB1				whiB1																Rv NO+	0
		Rv NO-	1			Rv NO+	1				whiB1				whiB1				0.73				phoP mut NO+	0.79
		phoP mut NO-	0.360938			phoP mut NO+	0.382435			Rv NO-	1			Rv NO+	1				1.13				phoP compl NO+	0.48
										phoP mut NO-	0.712025			phoP mut NO+	0.309927
																								whiB1
		whiB1 Normal																					Rv NO+	1
			set1	set2	average	std	se																phoP mut NO+	0.578344
		Rv	1	1	1	0	0																phoP compl NO+	0.716978
		phoP mut	0.360938	0.602904	0.481921	0.120983	0.0604914
		phoP compl	0.456916	0.475949	0.466432	0.00951664	0.00475832			whiB1 NO													phoP compl NO+	0.521233
		phoP compl mut	0.678641	0.525861	0.602251	0.108032	0.0540159				set1	set2	set3	average	std	se							average	0.619105
		P value	0.0176964							Rv	1	1	1	1	0	0
										phoP mut	0.382435	0.309927	0.578344	0.423569	0.113375	0.0566877
		whiB1 acid								phoP compl	0.716978	0.521233		0.619105	0.0978723	0.0489362
										phoP compl mut	0.415413	1.0426		0.729005	0.313593	0.156796
			whiB1					whiB14.5		p value	0.00202664
			set1	set2	set3	avg	std	SE
		Rv	1	1	1	1	0	0
		phoP mut	0.368019	0.418275	0.512367	0.432887	0.0598289	0.0299144
		phoP compl	0.762631	0.459617	0.780691	0.667646	0.147284	0.0736418
		phoP compl mut	0.758843	0.638752		0.698797	0.0600456	0.0300228
		pvalue	0.000320458

## Sheet: Sheet3
				umaA
					NS															umaA	gapdh		umaA	gapdh
				set1			set2				set3								Rv NO+	26.2797	17.0171		27.1317	16.5926
					gapdh														phoP mut NO +	28.1577	17.0933		28.8207	17.4247
			Rv	27.5969	16.617	10.9799	28.6525	16.7402	11.9123		27.1317	16.5926	10.5391						phoP compl NO+	26.2176	15.8998		25.9521	15.7817
			phoP mut	26.2915	16.1992	10.0923	29.8766	16.9524	12.9241		28.8207	17.4247	11.396							SET1		SET2
			phoP compl	26.1075	16.5942	9.51326	27.2188	15.4838	11.735		26.4992	16.3288	10.1704						Rv NO+	9.26259		10.5391
																			phoP mut NO +	11.0644		11.396
											Normal		set	set2	avg	stdev	se		phoP compl NO+	10.3178		10.1704
				set1	set2	set3					Rv	1	1	1	1
			Rv	10.9799	11.9123	10.5391	-0.887604	1.01182	0.856928		phoP mut	1.8501	0.495922	0.552127	0.96605	0.256746	0.128373		phoP mut NO +	1.80183	0.856928
			phoP mut	10.0923	12.9241	11.396	-1.46663	-0.177345	-0.368671		phoP compl	2.76375	1.1308	1.29116	1.72857	0.734904	0.367452		phoP compl NO+	1.05523	-0.368671
			phoP compl	9.51326	11.735	10.1704					phoP compl mut	1.50239	1.25		1.3762	0.126196	0.0630982
												pvalue	0.156922
				NS	NO	pH4.5
			Rv	1	1	1
			phoP mut	0.96605	0.419469	0.48414					NO stress			AVE	STDEV	SE N0
			phoP compl	1.72857	0.886192	0.55185					Rv NO+	1	1	1
			pvalue	0.156922	0.0169642	0.000228471					phoP mut NO +	0.28681	0.552127	0.419469	0.132658	0.0663291
											phoP compl NO+	0.481221	1.29116	0.886192	0.404971	0.202486
											phoP compl mut	0.194148	0.634773	0.414461	0.220313	0.110156
											pvalue	0.0169642
											Acid Stress
												umaA
																	umaA4.5
												set1	set2	set3	avg	std	se
											Rv	1	1	1	1	0	0
											phoP mut	0.552499	0.443962	0.455958	0.48414	0.0485848	0.0242924
											phoP compl	0.626689	0.462469	0.566392	0.55185	0.0678264	0.0339132
											phoP compl mut	0.212205	0.232252		0.222229	0.0100234	0.0050117
											pvalue	0.000228471
