# Supplementary material for: Convergence of two global regulators to coordinate expression of essential virulence determinants of Mycobacterium tuberculosis
Source: eLife journal article supplement (doi:10.7554/elife.80965), 2022-10-24
Supplement: data1 [file Figure 1B-source data.xlsx]

## Sheet: Sheet1
								crp
												avg	stdev	se
							Rv	1	1	1	1	1	0
							phoP mut	1.83306	1.05449	1.22565	1.3379	1.36278	0.289667	0.144834
							phopP compl	1.11913	1.44364	0.895072	0.747571	1.05135	0.262294	0.131147
							pvalue	0.04879
								aprA			avg	stdev	se
							Rv	1	1	1	1
							phoP mut	0.00225097	0.018585	0.0120613	0.00580986	0.00461299	0.00230649
							phoP compl		3.11805	0.774168	1.17194	0.28127	0.140635
							pvalue	1.05542e-07
								crp	aprA
							Rv	1	1
							phoP mut	1.36278	0.00580986
							phoP compl	1.05135	1.17194
