# Supplementary material for: Convergence of two global regulators to coordinate expression of essential virulence determinants of Mycobacterium tuberculosis
Source: eLife journal article supplement (doi:10.7554/elife.80965), 2022-10-24
Supplement: data1 [file Figure 1C-source data.xls]

## Sheet: Sheet2
												whiB1	icl1	umaA	espA	gapdh
												16.3747	5.62506		6.1587	1.26576
											Rv- Ab	13.1471	5.40204	4.40296	5.42747	1.1644
												11.6476	3.39269	7.91292	6.48678	1.27007
											avg	13.7231	4.80659	6.15794	6.02432	1.23341
											stdev	1.97235	1.00392	1.75498	0.442779	0.0488304
												0.986175	0.50196	0.877491	0.22139	0.0244152
											pvalue	0.00104941	0.00608742	0.0374385	0.000154663
												icl1	umaA	whiB1	gapdh	espA
											Rv -Ab	4.39736	6.15794	13.7231	1.23341	6.02432
											se	0.502338	0.877491	0.986175	0.0244152	0.22139
