# Supplementary material for: Convergence of two global regulators to coordinate expression of essential virulence determinants of Mycobacterium tuberculosis
Source: eLife journal article supplement (doi:10.7554/elife.80965), 2022-10-24
Supplement: data1 [file Figure 2-figure supplement 1C - source data.xlsx]

## Sheet: Sheet1
								set1	set2	avg	stv	se
							WT whiB1 UI	1.19469	0.312876	0.753783	0.440907	0.220454
							WT whiB1 I	6.18132	7.13333	6.65733	0.476007	0.238004
							MT whiB1 UI	1.81501	1.7551	1.78506	0.0299533	0.0149767
							MT whiB1 I	1.79143	1.58488	1.68815	0.103274	0.0516371
							WT whiB1 UI	0.753783
							WT whiB1 I	6.65733
							Mut whiB1 UI	1.78506
							Mut whiB1 I	1.68815
						pvalue	0.00794531
