# Supplementary material for: Convergence of two global regulators to coordinate expression of essential virulence determinants of Mycobacterium tuberculosis
Source: eLife journal article supplement (doi:10.7554/elife.80965), 2022-10-24
Supplement: data1 [file Figure 3-figure supplement 1B-source data.xlsx]

## Sheet: Sheet1
									Msmeg::crp	Msmeg::cmr		SE
									crp	cmr		758.337
								Avg	7.36186	12.2967		1525.61
									16SrRNA		average	std	se
								Msmeg::crp	11.5781	9.86654	10.7223	0.855764	0.427882
								Msmeg::cmr	9.69424	12.5399	11.1171	1.42284	0.711421
