# Supplementary material for: Convergence of two global regulators to coordinate expression of essential virulence determinants of Mycobacterium tuberculosis
Source: eLife journal article supplement (doi:10.7554/elife.80965), 2022-10-24
Supplement: data1 [file Figure 6B- source data.xlsx]

## Sheet: Sheet1
			icl1	0079	whib1	sucC	16s
		H37Rv set 1	4.2247	3.47514	14.2564	9.72952	0.999998
		H37Rv set 2	8.08045	6.09086	24.3294	4.65505	1
		H37Rv set 3	6.15257	4.28526	16.3747	6.40275	0.999999
			6.15257	4.61709	18.3202	6.9291	0.999999
		stdsev	1.92787	1.33906	5.31086	1.19044	1.15729e-06
		se	0.963937	0.669528	2.65543	0.595219	5.78644e-07
		PhoP mut set 1	0.815504	1.32417	0.216346	10.4931	0.999997
		PhoP mut set 2	0.183931	1.15076	0.945303	3.39999	0.999999
		PhoP mut set 3	1.0669	1.19249	0.572891	2.51412	0.999998
			0.688777	1.22247	0.57818	5.46908	0.999998
		stddev	0.442997	0.0867055	0.364478	1.51645	7.92396e-07
		se	0.221498	0.0433527	0.182239	0.758225	3.96198e-07
			icl1	Rv0079	whib1	sucC	16s
		H37Rv	6.15257	4.61709	18.3202	6.9291	0.999999
		phoP mut	0.688777	1.22247	0.57818	5.46908	0.999998
		p value	0.00970986	0.00990681	0.00314018	0.222811
		se H37Rv	0.963937	0.669528	2.65543	0.595219	5.78644e-07
		se phoP mut	0.221498	0.0433527	0.182239	0.758225	3.96198e-07
